# Supplementary material for: Robust and Functional Immune Memory Up to 9 Months After SARS-CoV-2 Infection: A Southeast Asian Longitudinal Cohort
Source: Front Immunol. 2022 Feb 3;13:817905. doi: 10.3389/fimmu.2022.817905 (PMC8853741; doi:10.3389/fimmu.2022.817905)
Supplement: Supplementary file 1 [file DataSheet_1.pdf]

## Supporting information

**S1 Table. Cohort Description**

|                                                                                    | SARS-CoV-2-infected<br>patients (n=64) |
|------------------------------------------------------------------------------------|----------------------------------------|
| Age (y), median (min-max, IQR)                                                     | 36 (12-75, 18.5)                       |
| Sex (%)                                                                            |                                        |
| <i>Male</i>                                                                        | 55 (86)                                |
| <i>Female</i>                                                                      | 9 (14)                                 |
| <i>Smoker (%)</i>                                                                  | 8 (13)                                 |
| <i>Comorbidities (%)</i>                                                           |                                        |
| Diabetes                                                                           | 2 (3)                                  |
| High blood pressure                                                                | 7 (11)                                 |
| <i>Clinical spectrum (%)</i>                                                       |                                        |
| Asymptomatic                                                                       | 19 (30)                                |
| Symptomatic                                                                        | 45 (70)                                |
| <i>Dysosmia and dysgeusia</i>                                                      | 15 (23)                                |
| <i>Dyspnea</i>                                                                     | 16 (25)                                |
| <i>Fever</i>                                                                       | 23 (36)                                |
| <i>Cough or sore throat or running nose</i>                                        | 35 (55)                                |
| <i>Days from SARS-CoV-2 positive RT-PCR to sample collection, median (min-max)</i> |                                        |
| Acute                                                                              | 5 (2-9)                                |
| 6-9 months                                                                         | 203 (166-258)                          |
| <i>Time of SARS-CoV-2 RNA shedding (%)</i>                                         |                                        |
| < 10 days positive                                                                 | 30 (47)                                |
| ≥ 10 days positive                                                                 | 34 (53)                                |

**S2 Table. Monoclonal antibody list**

| <b>Marker</b> | <b>Fluorochrome</b> | <b>Supplier</b>        | <b>Catalog N.</b> |
|---------------|---------------------|------------------------|-------------------|
| C3/C3b/iC3b   | APC                 | Cedarlane              | CL7503APC         |
| CCR6          | BB515               | BD Biosciences         | 564479            |
| CCR7          | APC                 | Biolegend              | 353214            |
| CD107a        | APC                 | BD Biosciences         | 560664            |
| CD134         | BB700               | BD Biosciences         | 566559            |
| CD137         | PE-Cy7              | Biolegend              | 309818            |
| CD138         | BV785               | Biolegend              | 356538            |
| CD19          | APC/Cy7             | Biolegend              | 302218            |
| CD27          | PerCP/Cy5.5         | Biolegend              | 356408            |
| CD3           | BUV395              | BD Biosciences         | 564001            |
| CD3           | Per-Cp5-5           | Biolegend              | 317336            |
| CD38          | BV 605              | Biolegend              | 303532            |
| CD4           | BUV496              | BD Biosciences         | 612936            |
| CD45RA        | BV421               | Biolegend              | 304130            |
| CD56          | BV421               | Biolegend              | 362552            |
| CD69          | BV786               | Biolegend              | 310932            |
| CD69          | PE-Cy7              | Biolegend              | 310912            |
| CD8           | AF700               | Biolegend              | 344724            |
| CD8           | APC-H7              | BD Biosciences         | 560179            |
| CXCR3         | BV711               | Biolegend              | 353732            |
| IFN- $\gamma$ | BV605               | Biolegend              | 502536            |
| IFN- $\gamma$ | PE                  | Biolegend              | 506507            |
| IgA           | APC                 | Miltenyi Biotec        | 130-113-472       |
| IgA           | AF 647              | Jackson ImmunoResearch | 109-605-011       |
| IgD           | BV711               | BD Biosciences         | 740794            |
| IgG           | APC                 | Life technology        | A21445            |
| IgG           | FITC                | Biolegend              | 410720            |
| IgM           | PE                  | Biolegend              | 314508            |
| IgM           | BV421               | Biolegend              | 314515            |
| IL-17         | BV711               | Biolegend              | 512328            |
| IL-2          | PerCP/Cy.5          | Biolegend              | 500322            |
| IL-4          | BUV737              | BD Biosciences         | 612835            |
| IL-6          | PE                  | Biolegend              | 501107            |
| TNF- $\alpha$ | APC-Cy7             | Biolegend              | 502944            |

**A**

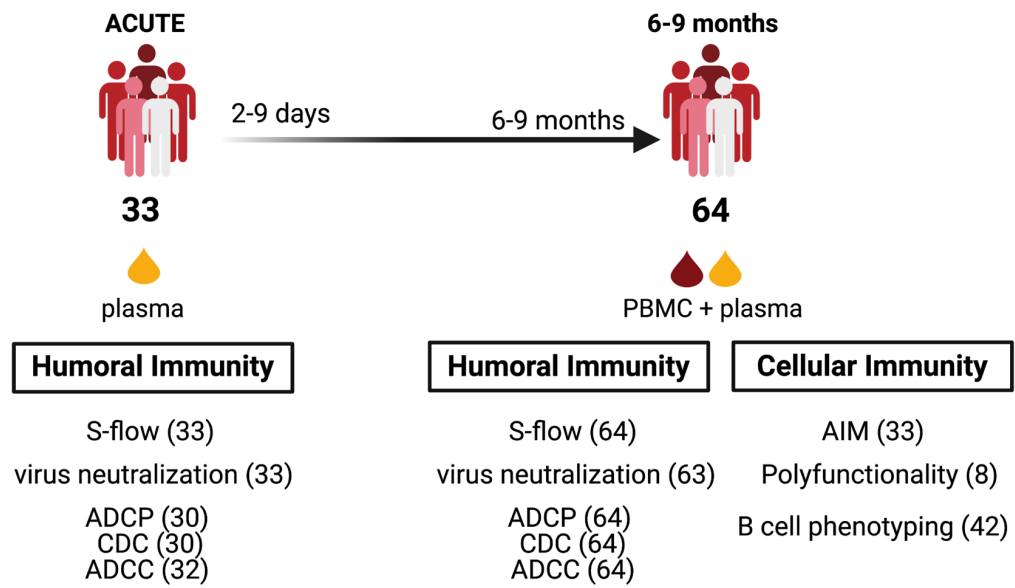

**B**

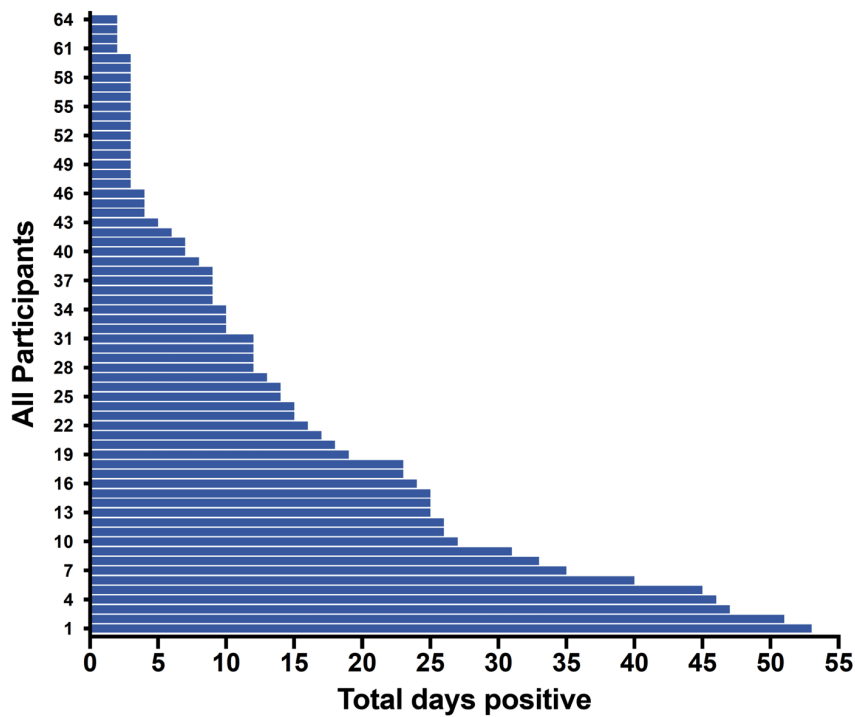

**S1 Figure. Characterization of the cohort**

(A) Graphical summary of the assays performed on samples of the different time points. (B) Length of RNA shedding in the patients.

**A**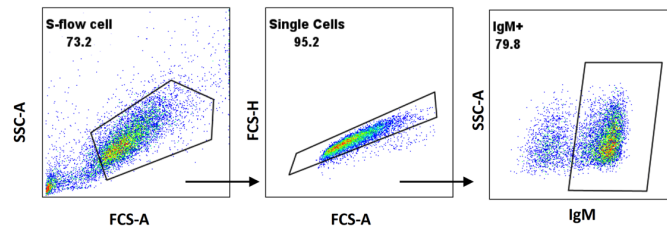**B**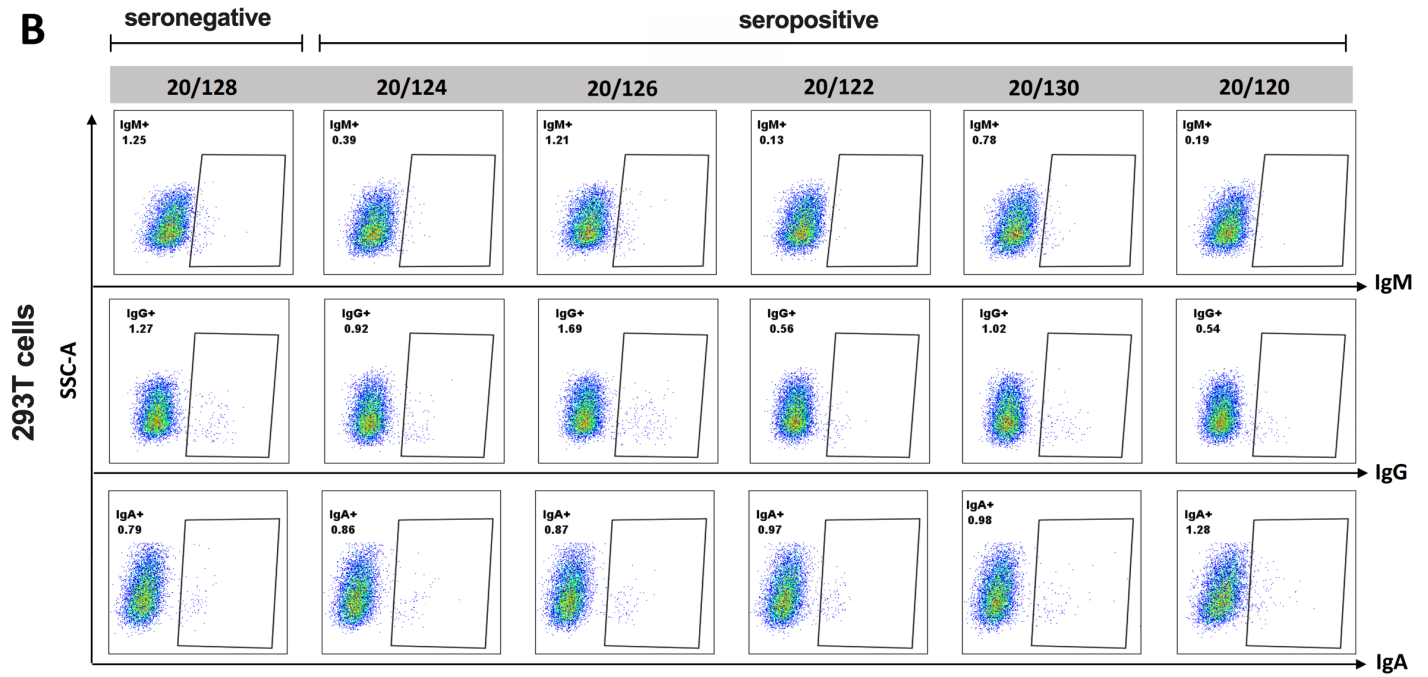**C**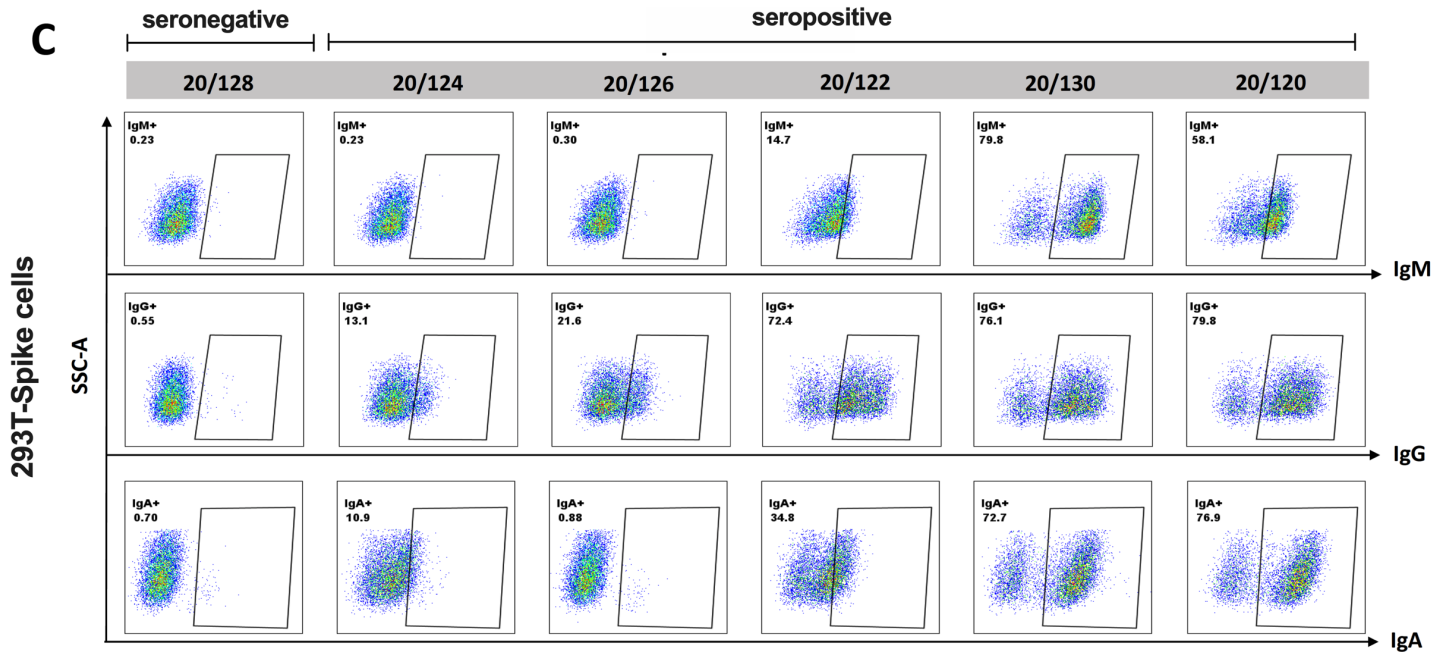

## **S2 Figure. Measurement of anti-S-binding antibodies using S-Flow**

(A) Representative gating strategy (B-C) Percentages of spike-binding Ig were measured in plasma as percentage of cells, which are positive for anti-IgM, anti-IgG or anti-IgA. Specific binding was calculated as  $100 \times (\% \text{ binding on S-expressing 293T cells} - \% \text{ binding on 293T control cells}) / (100 - \% \text{ of binding to 293T control cells})$ . Graph shows data from triplicate testing of the COVID-19 reference plasma panel (NIBSC 20/120, 20/124, 20/124, 20/126, 20/128, 20/130) obtained from the NIBSC.

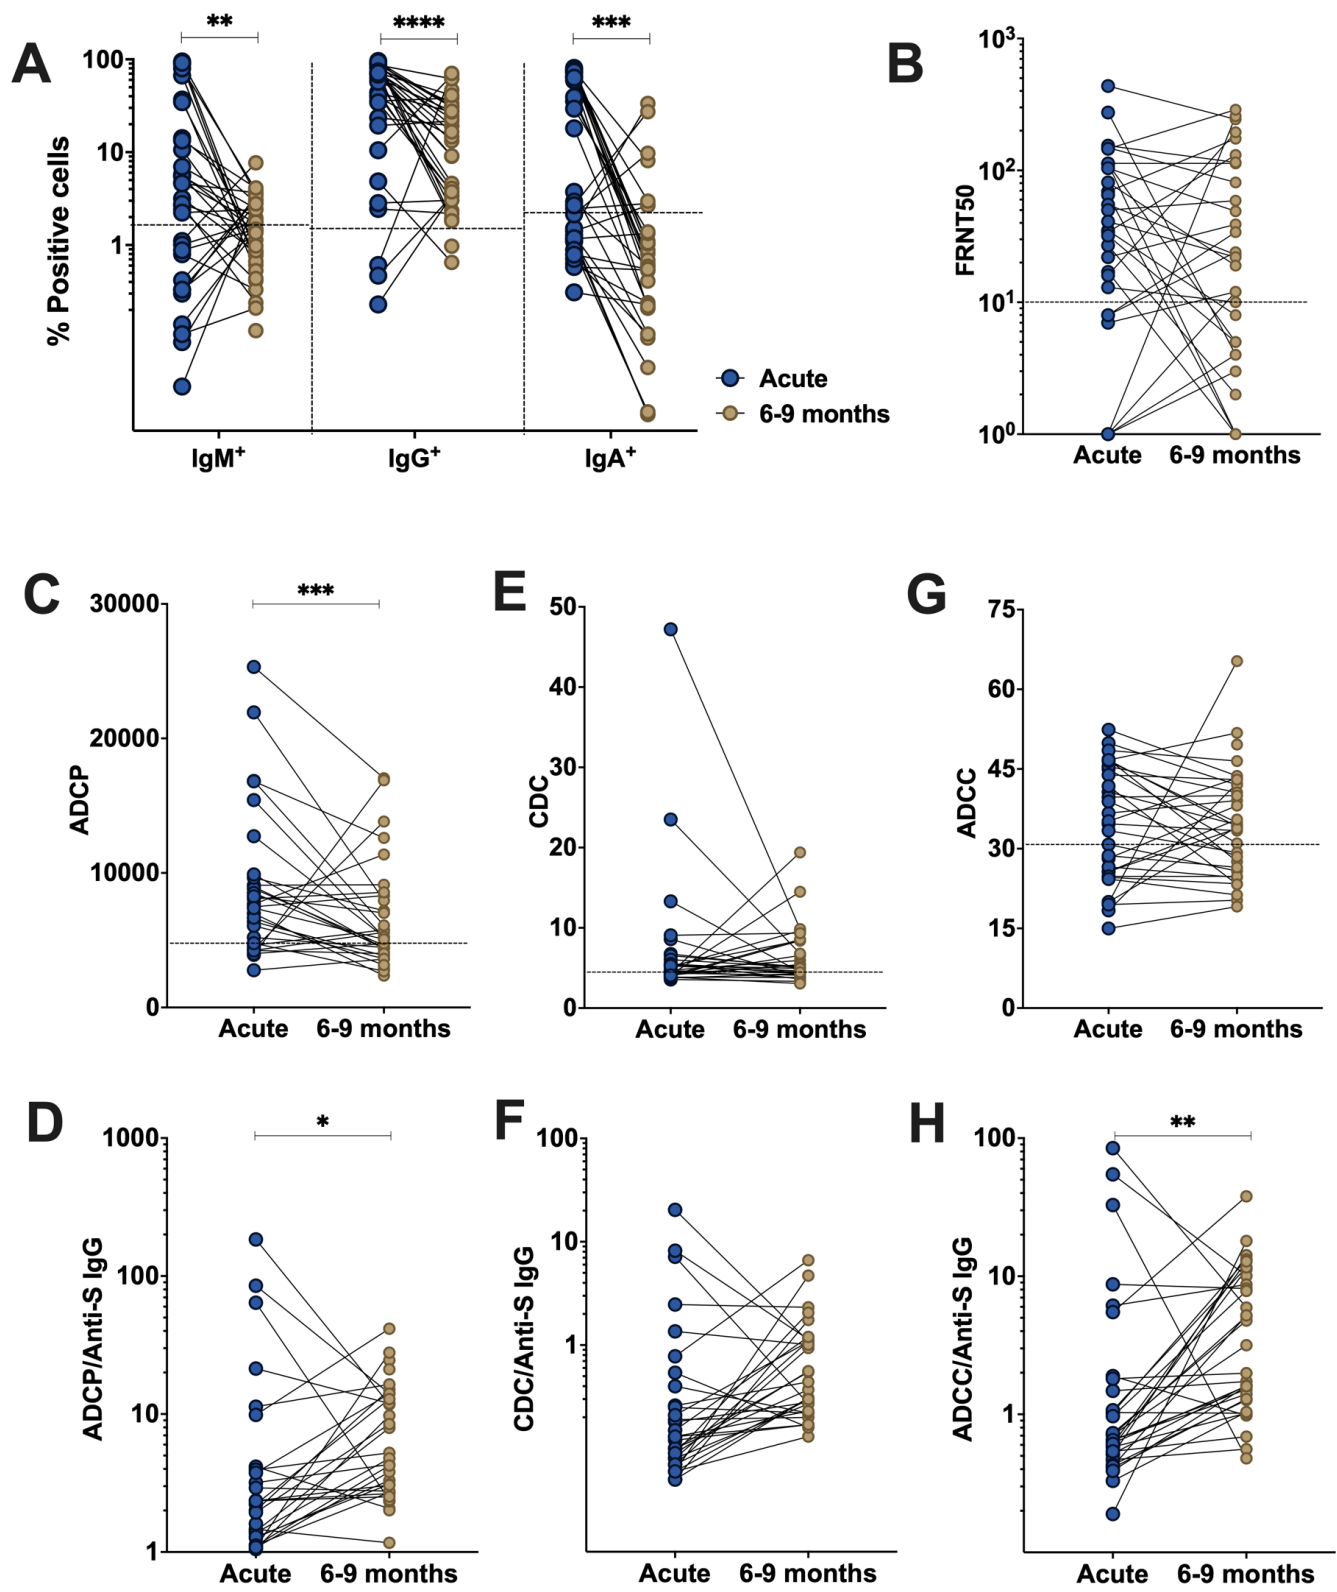

### **S3 Figure. Analysis of antibody features in paired patient samples**

Individuals were sampled 2-9 days post laboratory confirmation and 6-9 months later. **(A)** Amount of antibodies against spike protein were reported as percentage of spike-expressing 293T cells bound by IgM, IgG, IgA in the S-Flow assay. **(B)** SARS-CoV-2 neutralizing activity was calculated as FRNT50 titer in foci reduction neutralization test. **(C)** Comparison of ADCP activity in SARS-CoV-2-infected individuals in the acute phase of infection and 6-9 months post-infection. **(D)** Ratio of ADCP to anti-spike IgG measured by S-Flow. **(E)** Comparison of CDC activity in SARS-CoV-2-infected individuals in the acute phase of infection and 6-9 months post infection. **(F)** Ratio of CDC to anti-spike IgG measured by S-Flow. **(G)** Comparison of ADCC activity in SARS-CoV-2-infected individuals in the acute phase of infection and 6-9 months post infection. **(H)** Ratio of ADCC to anti-spike IgG measured by S-Flow. Statistical comparisons were performed by Wilcoxon test. The dashed line indicates the cutoff for positivity based on values calculated following formula: cut-off = % mean positive cells from 19 pre-pandemic samples + 3x standard deviation. Each dot represents result from a single individual. Lines represent median and IQR. Each dot represents one individual. Lines represent median and IQR. \* $p < 0.05$ , \*\* $p < 0.01$ , \*\*\* $p < 0.001$ , and \*\*\*\* $p < 0.0001$ . IgM/IgA/IgG antibody:  $n=33$ , Neutralization:  $n=33$ , ADCP:  $n=30$ , CDC:  $n=30$ , ADCC  $n=32$ .

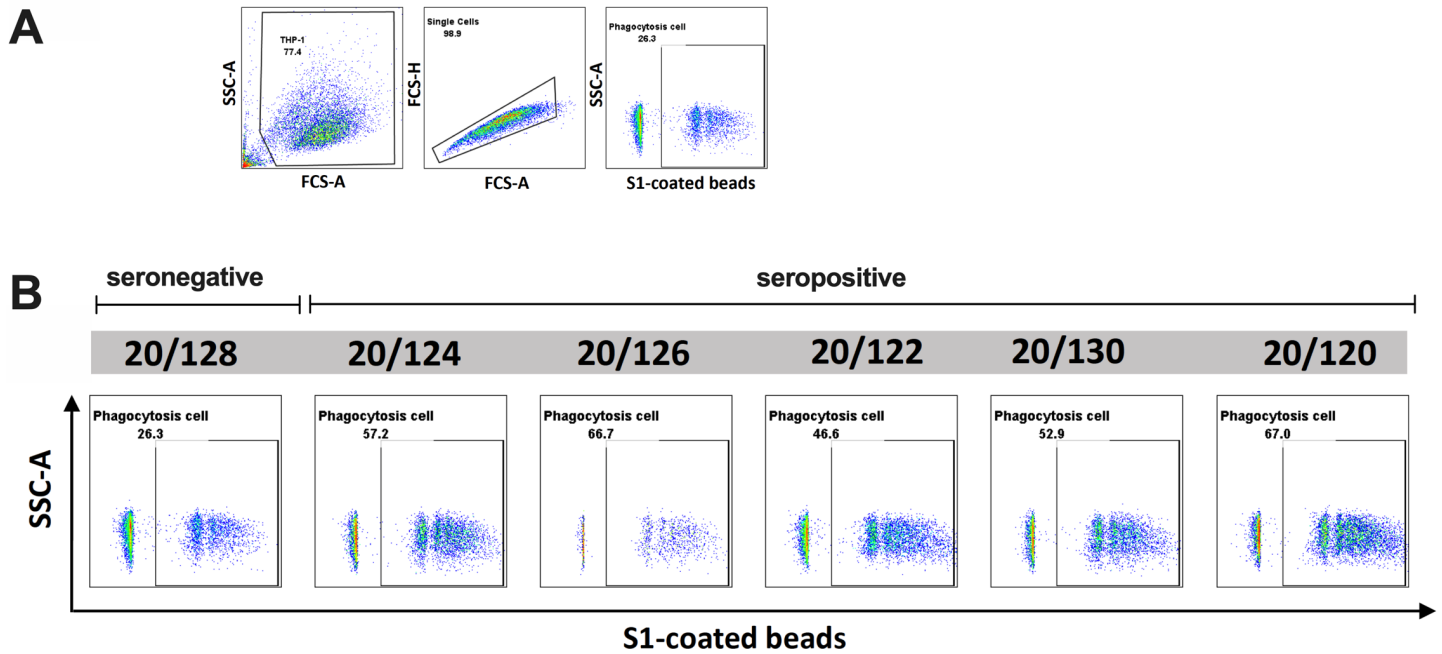

#### S4 Figure. Antibody-dependent cellular phagocytosis (ADCP) assay

Quantification of the S1-coated beads engulfed by THP-1 cells. **(A)** Representative gating strategy. **(B)** ADCP was defined by the percentages of THP-1 cells which are positive for FITC-neutravidin beads coated with biotinylated S1 protein. Representative ADCP assay using the COVID-19 reference plasma panel (NIBSC 20/120, 20/124, 20/124, 20/126, 20/128, 20/130) obtained from the NIBSC. The ADCP activity represents the integrate mean fluorescence intensity (iMFI) value (% positive fluorescence THP-1 cells x MFI of the positive fluorescence THP-1 cells). The experiment was performed in duplicate.

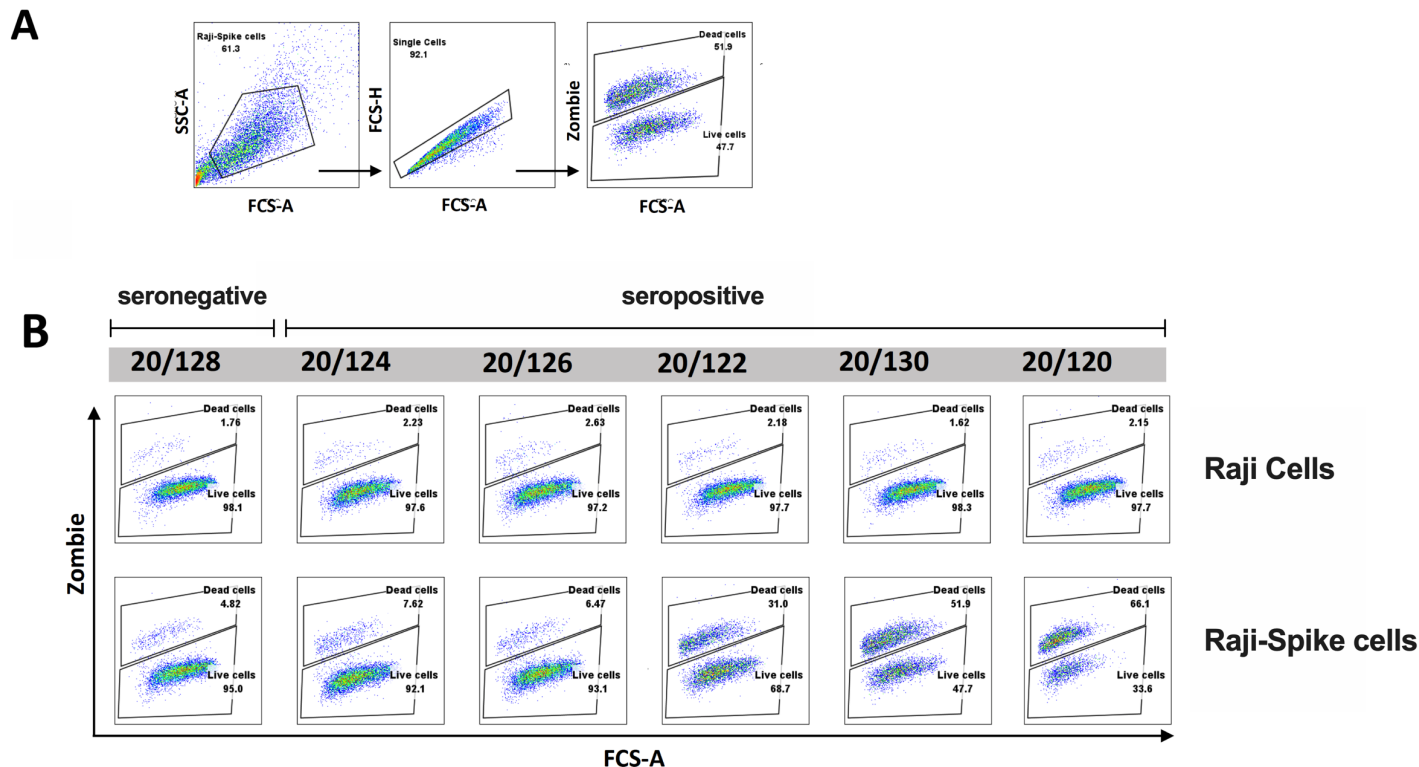

### S5 Figure. Complement-dependent cytotoxicity (CDC) assay

SARS-CoV-2 plasma induces C3 deposition and cell death in spike-expressing Raji cells. **(A)** Representative gating strategy. **(B)** CDC assay was performed by using spike-expressing Raji cells as target cells, serum (pooled from 3 healthy donors) as complement source and heat-inactivated plasma from SARS-CoV-2 patients or from reference panel as antibody source. CDC activity was measured as the percentage of C3<sup>+</sup>Zombie<sup>+</sup> spike-expressing Raji cells after incubation with plasma and complement. Representative CDC assay using the COVID-19 reference plasma panel (NIBSC 20/120, 20/124, 20/124, 20/126, 20/128, 20/130) obtained from the NIBSC. Complement-induced cell death was calculated as percentage of C3<sup>+</sup> dead cells of total cells using spike-expressing Raji cells as target cell. The experiment was performed in duplicate.

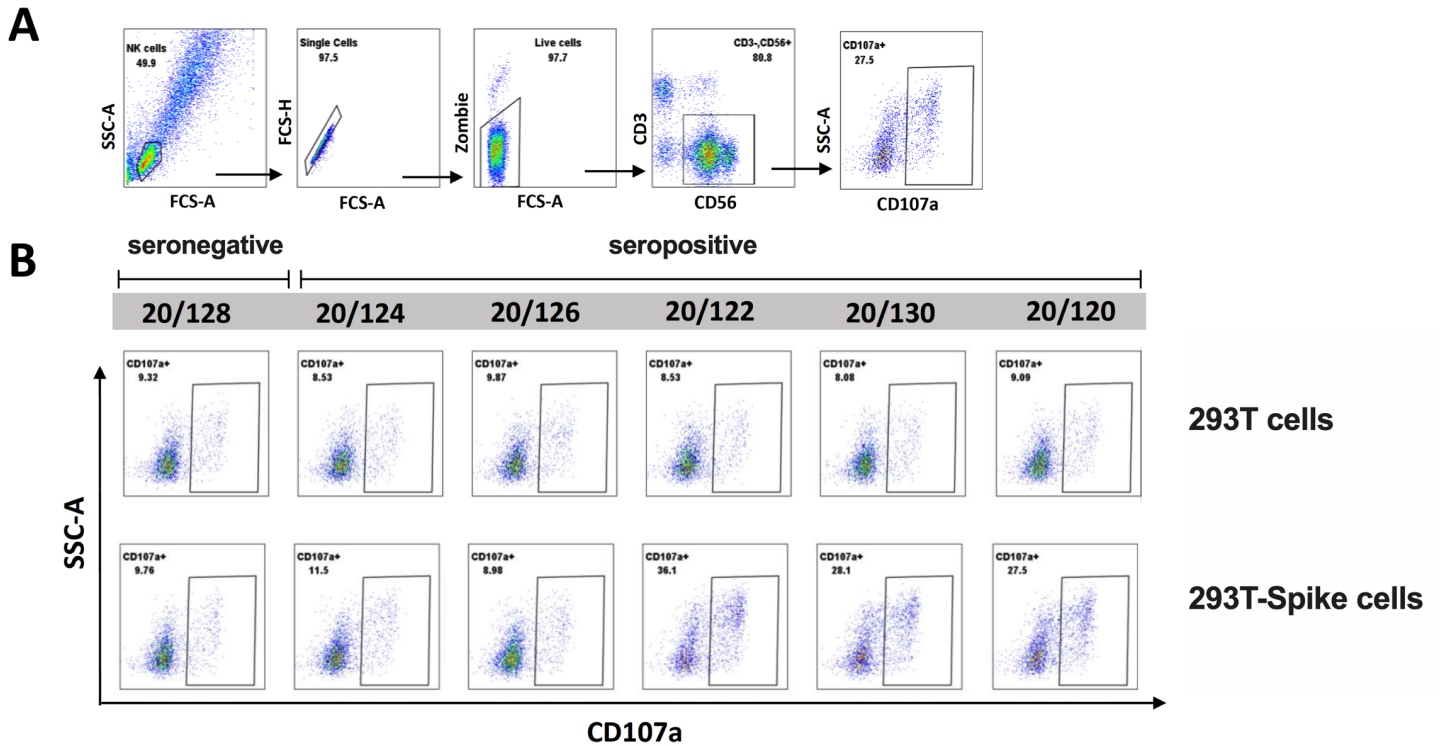

**S6 Figure. Antibody-dependent cellular cytotoxicity (ADCC) assay**

(A). Representative gating strategy. NK cells were identified by lymphocyte morphology, singlet, live cell and  $CD3^+CD56^+$ . The ADCC activity was defined based on NK cell degranulation ( $CD107^+$ ). (B-C) ADCC activity of NK cells induced by incubation with COVID-19 reference plasma panel (NIBSC 20/120, 20/124, 20/124, 20/126, 20/128, 20/130) obtained from the NIBSC in the presence of 293T-spike cells or 293T control cells. The experiment was performed in duplicate.

**A**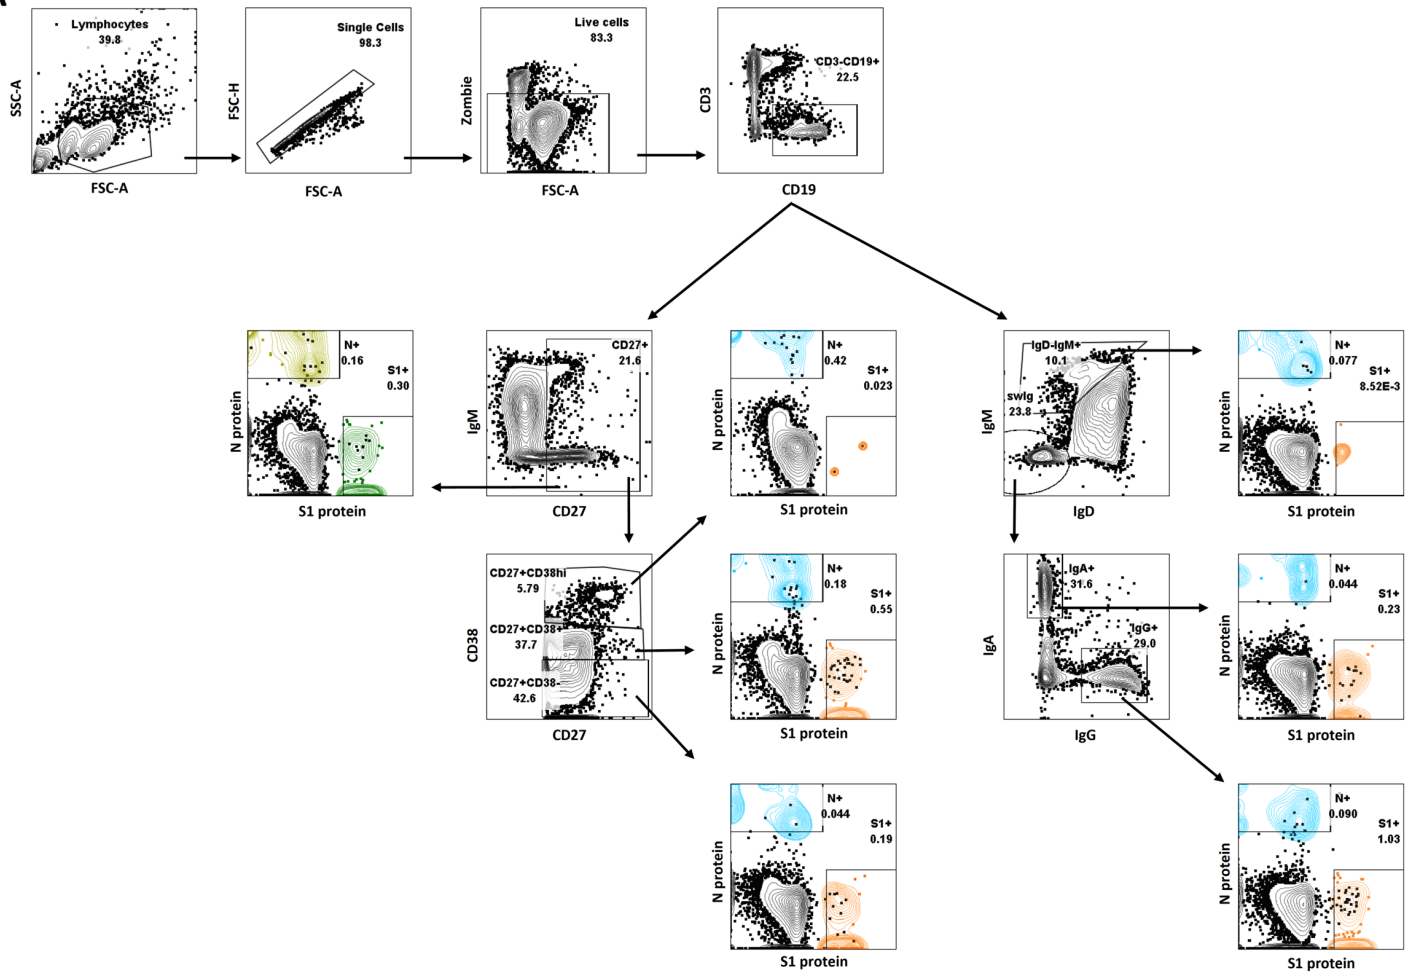**B****Healthy Controls**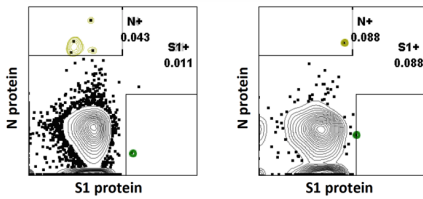**SARS-CoV-2+**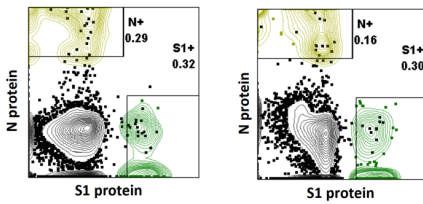

**S7 Figure. Representative gating strategy used to define antigen-specific B cells**

(A) B cells were defined from the gates of morphology of lymphocytes, singlets, viability and CD3<sup>+</sup>CD19<sup>+</sup>. Total B cells (CD19<sup>+</sup>) were further gated for B cell subsets including resting memory B cells (CD27<sup>+</sup>CD38<sup>-</sup>), activated memory B cells (CD27<sup>+</sup>CD38<sup>+</sup>) and plasma blasts (CD27<sup>+</sup>CD38<sup>hi</sup>). S1-specific B cells and N-specific B cells were determined. Total B cells (CD19<sup>+</sup>) were further separated into non-class-switched mature cells (IgD<sup>+</sup>IgM<sup>+</sup>) and class-switched IgM<sup>-</sup>IgD<sup>-</sup>IgA<sup>+</sup> and IgM<sup>-</sup>IgD<sup>-</sup>IgG<sup>+</sup> cells. The S1-specific B cells and N-specific B cells were determined. (B) Representative image comparing S1- and N-specific B cells in 2 different healthy controls and 2 different SARS-CoV-2-infected patients 6-9 months post infection.

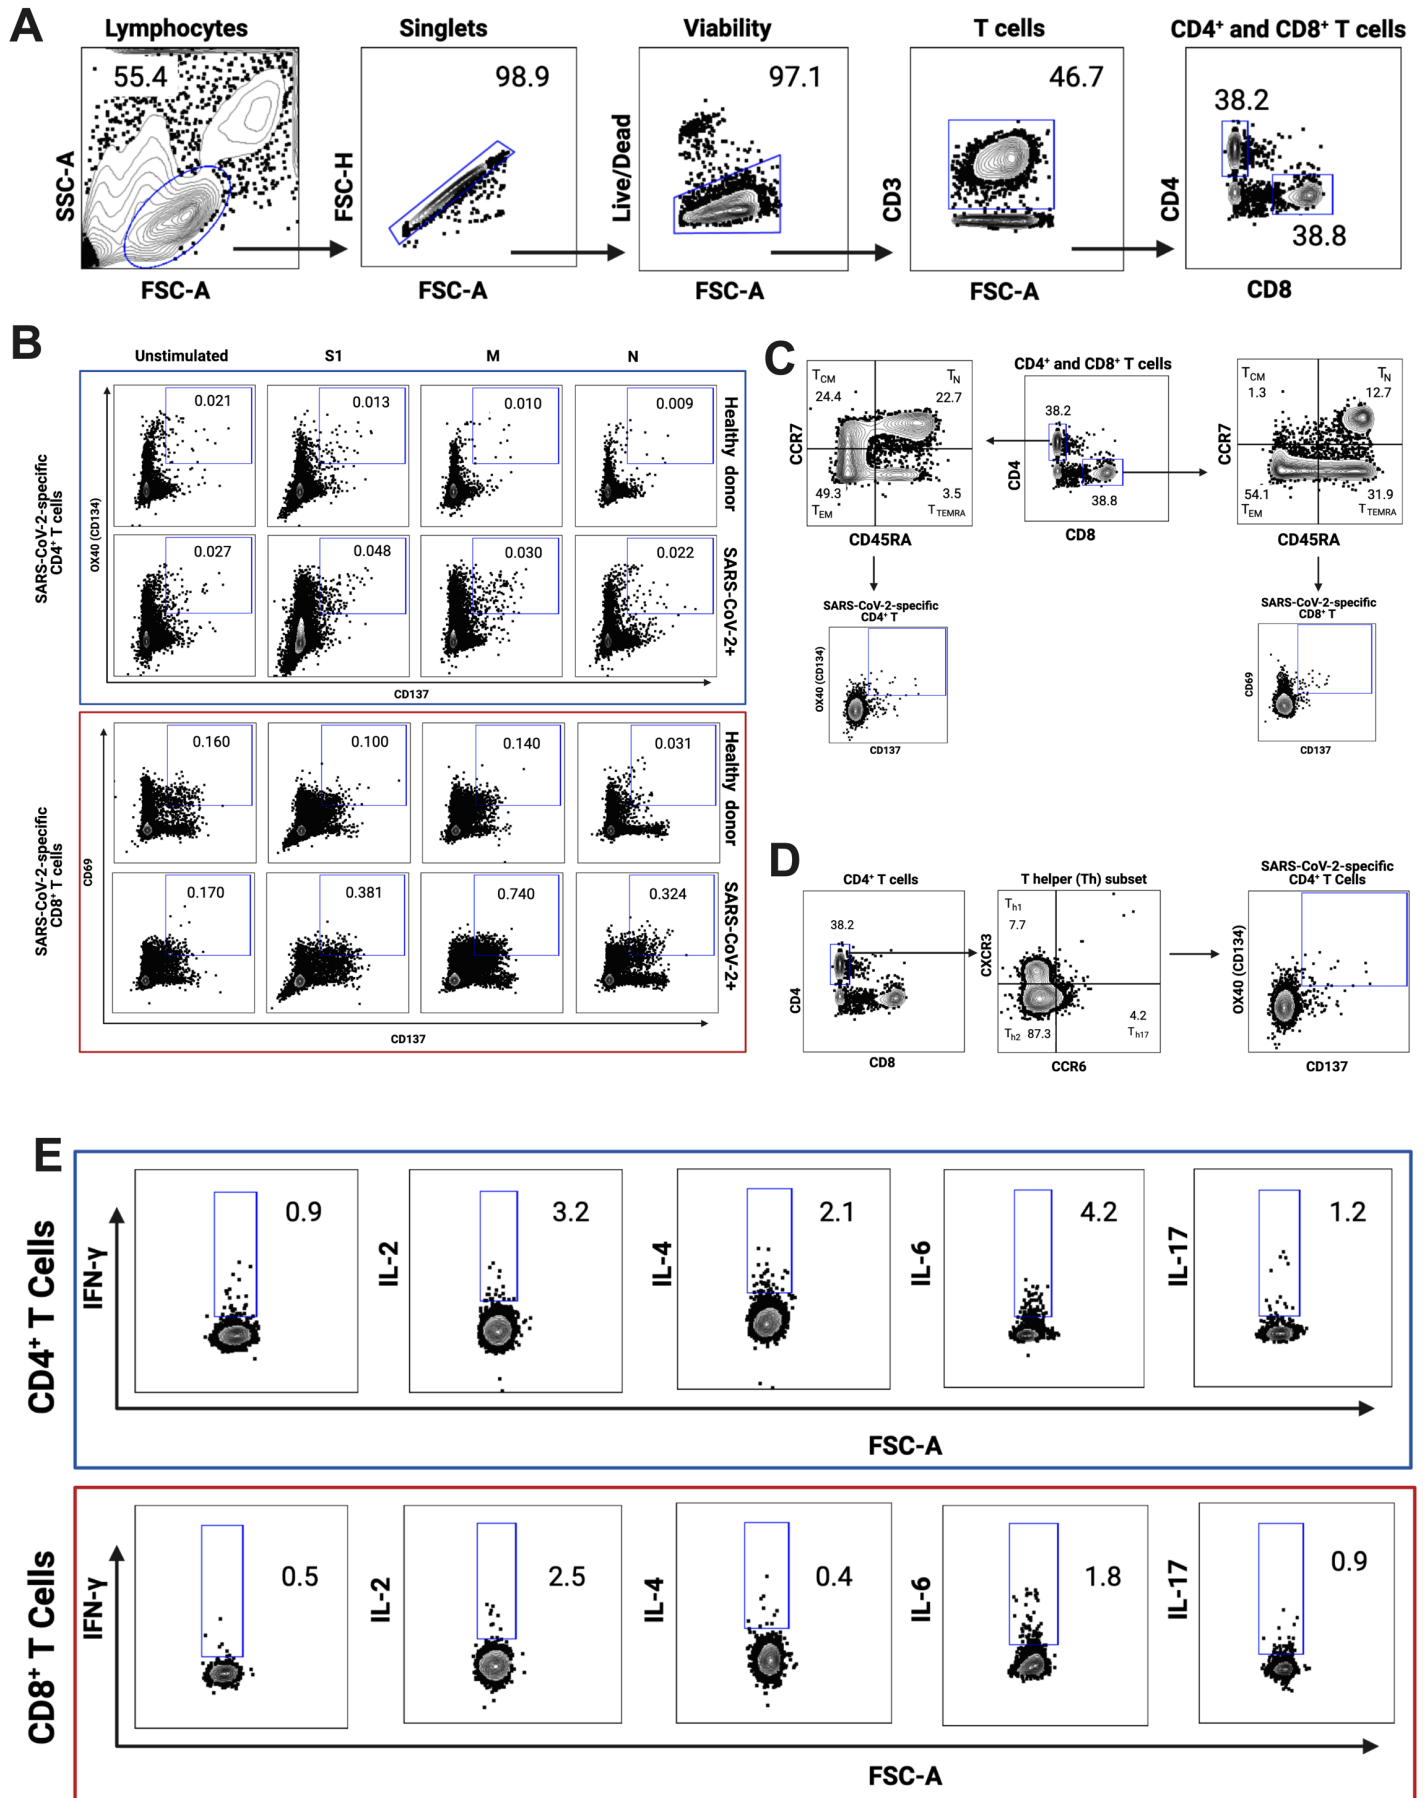

### **S8 Figure. Representative gating strategy used for the T cells assays**

**(A)** T cells were defined from the gates of morphology of lymphocytes, singlets, viability and CD3<sup>+</sup>. **(B)** Gating strategy used in the CD4<sup>+</sup> and CD8<sup>+</sup> T cell activation induced marker (AIM) assay to assess the SARS-CoV-2-specific CD4<sup>+</sup> and CD8<sup>+</sup> T cells after overnight stimulation with S, M and N peptide pools. Representative image comparing S-, M- and N-specific CD4<sup>+</sup> and CD8<sup>+</sup> T cells in a healthy control and a SARS-CoV-2-infected patient 6-9 months post infection. **(C)** Gating strategy used in the CD4<sup>+</sup> and CD8<sup>+</sup> T cell activation induced marker (AIM) assay to assess the SARS-CoV-2-specific memory CD4<sup>+</sup> and CD8<sup>+</sup> T cell subsets. Distribution of central memory (TCM), effector memory (TEM), and terminally differentiated effector memory cells (TEMRA) among total SARS-CoV-2-specific T cells. **(D)** Gating strategy used in the CD4<sup>+</sup> T cell activation induced marker (AIM) assay to assess SARS-CoV-2-specific T helper (Th) subsets. **(E)** Gating strategy used in the CD4<sup>+</sup> and CD8<sup>+</sup> T cell intracellular staining assay to assess the cellular cytokine profile after 6 hours stimulation with S, M and N peptide pools.

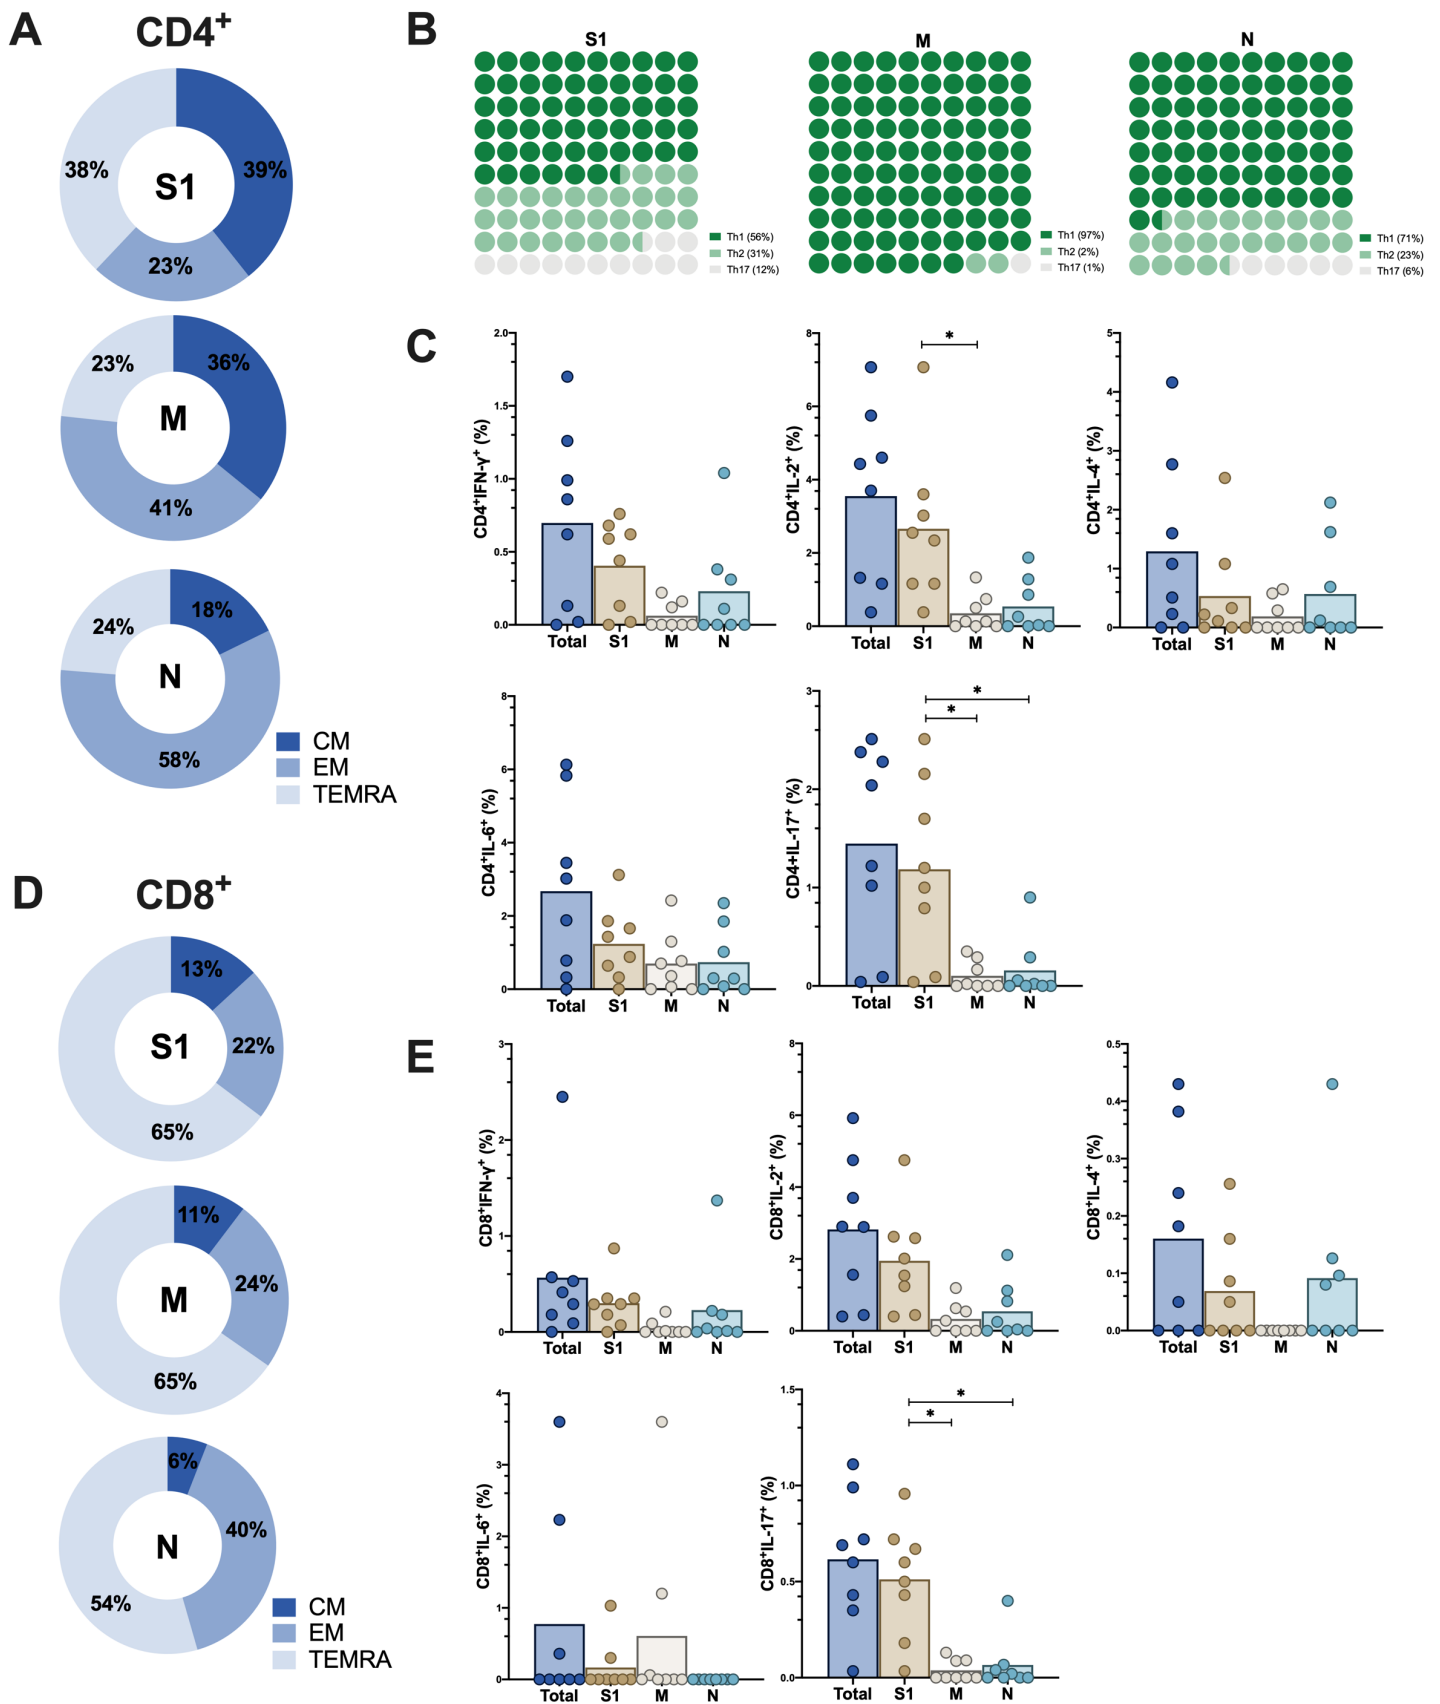

### **S9 Figure. Characterization of SARS-CoV-2-specific T Cells**

**(A)** Distribution of central memory (TCM), effector memory (TEM), and terminally differentiated effector memory cells (TEMRA) CD4<sup>+</sup> T cells targeting different proteins of SARS-CoV-2 after overnight stimulation with different peptide pools. **(B)** The CD4<sup>+</sup> Th differentiation, targeting different proteins of SARS-CoV-2, after overnight stimulation with different peptide pools. **(C)** Cytokine profile of CD4<sup>+</sup> T cells after 6 hours stimulation with S, M and N peptide pools. **(D)** Distribution of central memory (TCM), effector memory (TEM), and terminally differentiated effector memory cells (TEMRA) CD8<sup>+</sup> T cells targeting different proteins of SARS-CoV-2, after overnight stimulation with different peptide pools. **(E)** Cytokine profile of CD8<sup>+</sup> T cells after 6 hours stimulation with S, M and N peptide pools.

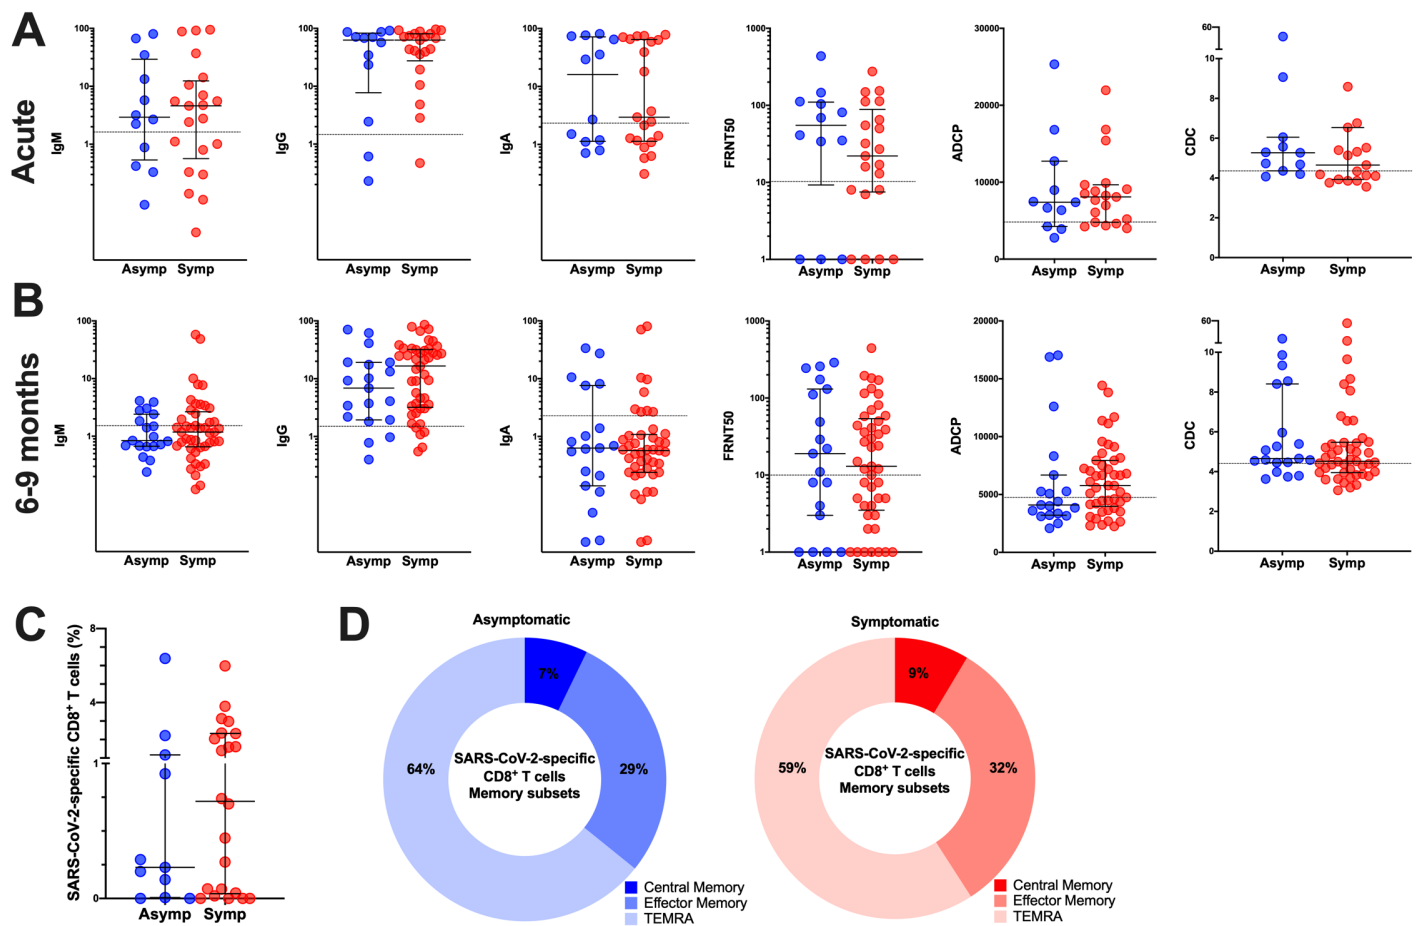

**S10 Figure. Comparison of immune parameters in asymptomatic and symptomatic individuals**

Comparison of anti-S antibody titers, FRNT50 titers and anti-S mediated effector functions in the **(A)** acute phase and **(B)** late convalescent phase after infection. **(C)** Comparison of the frequency of total SARS-CoV-2-specific CD8<sup>+</sup> T cells after overnight stimulation with peptide pools in asymptomatic individuals (asyp; n=11) and symptomatic patients (symp; n=22) at late convalescence. **(D)** Comparison of CD8<sup>+</sup> T cell memory phenotype between asymptomatic individuals (asyp; n=11) and symptomatic patients (symp; n=22).

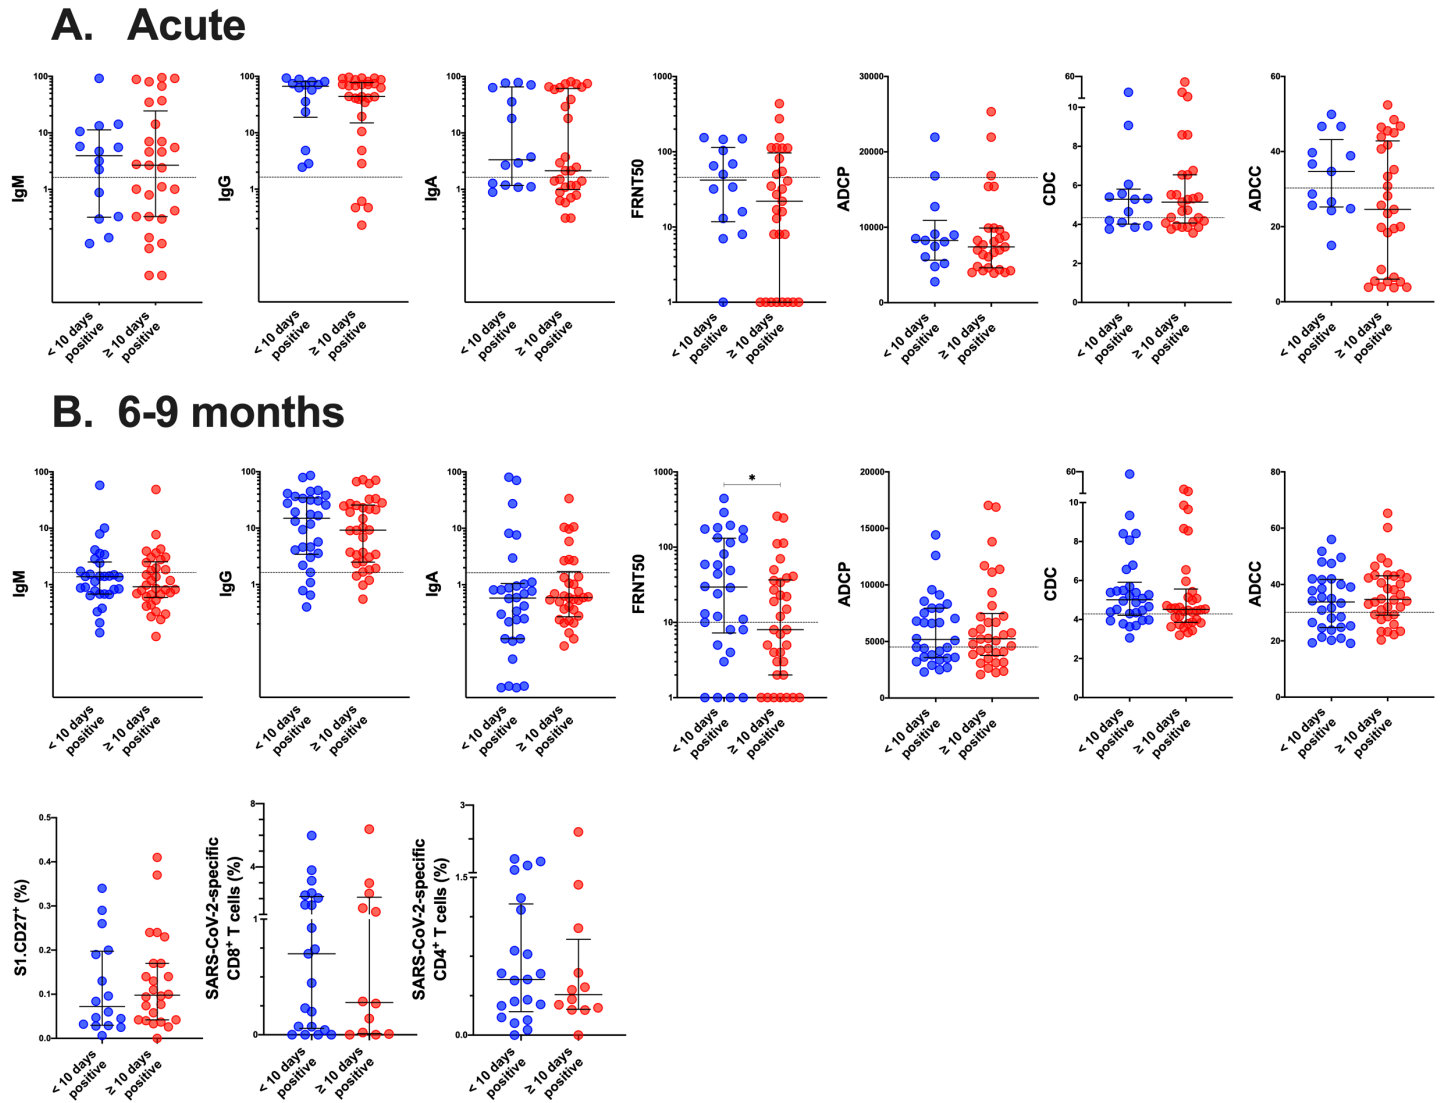

**S11 Figure. Comparison of immune parameters according to time of SARS-CoV-2 shedding: < 10 days or ≥ 10 days.** (A) Comparison of anti-S IgM, IgG and IgA antibody titers (n=33), FRNT50 titers (n=33) and anti-S mediated effector functions (ADCP and CDC n=30; ADCC n=32) in the acute phase and (B) comparison of anti-S IgM, IgG and IgA antibody titers (n=64), FRNT50 titers (n=64), anti-S mediated effector functions (n=64) and frequency of S1-specific CD19<sup>+</sup>CD27<sup>+</sup> B cells (n=40), and total SARS-CoV-2-specific CD4<sup>+</sup> and CD8<sup>+</sup> T cells (n=33) in the late convalescent phase after infection.
